# Supplementary material
Source: PubMed Central journal article supplement (PMC4080147)
Supplement: table.pdf [file table.pdf]

**Supplemental Material:**

**Table of values used in Figures 1-3.**

| <b>Muscle TAG levels<br/>(ug/mg muscle)</b>                    |                       |                    |                     |                  | <b>Muscle Oleic Levels in TAG<br/>(ug/mg muscle)</b>            |                       |                    |                     |                  |
|----------------------------------------------------------------|-----------------------|--------------------|---------------------|------------------|-----------------------------------------------------------------|-----------------------|--------------------|---------------------|------------------|
|                                                                | Sedentary<br>glycerol | Sedentary<br>Lipid | Trained<br>glycerol | Trained<br>Lipid |                                                                 | Sedentary<br>glycerol | Sedentary<br>Lipid | Trained<br>glycerol | Trained<br>Lipid |
| Bx1                                                            | 3.81<br>(0.8)         | 3.97<br>(0.89)     | 3.55<br>(0.83)      | 4.1<br>(0.74)    | Bx1                                                             | 1.17<br>(0.25)        | 1.05<br>(0.12)     | 1.07<br>(0.34)      | 1.21<br>(0.27)   |
| Bx2                                                            | 3.3<br>(0.8)          | 4.83<br>(0.86)     | 4.73<br>(0.8)       | 4.3<br>(0.77)    | Bx2                                                             | 1.01<br>(0.25)        | 1.27<br>(0.11)     | 1.49<br>(0.33)      | 1.25<br>(0.28)   |
| Bx3                                                            | 3.25<br>(0.8)         | 4.29<br>(0.94)     | 4.76<br>(0.8)       | 5.42<br>(0.77)   | Bx3                                                             | 1.11<br>(0.25)        | 1.12<br>(0.13)     | 1.58<br>(0.34)      | 1.61<br>(0.28)   |
| <b>Muscle Linoleic (18:2) Levels in TAG<br/>(ug/mg muscle)</b> |                       |                    |                     |                  | <b>Muscle Linolenic (18:3) Levels in TAG<br/>(ug/mg muscle)</b> |                       |                    |                     |                  |
|                                                                | Sedentary<br>glycerol | Sedentary<br>Lipid | Trained<br>glycerol | Trained<br>Lipid |                                                                 | Sedentary<br>glycerol | Sedentary<br>Lipid | Trained<br>glycerol | Trained<br>Lipid |
| Bx1                                                            | 0.74<br>(0.2)         | 0.65<br>(0.08)     | 0.59<br>(0.16)      | 0.57<br>(0.11)   | Bx1                                                             | 0.04<br>(0.008)       | 0.043<br>(0.006)   | 0.04<br>(0.01)      | 0.043<br>(0.01)  |
| Bx2                                                            | 0.58<br>(0.21)        | 0.88<br>(0.08)     | 0.72<br>(0.15)      | 0.6<br>(0.12)    | Bx2                                                             | 0.03<br>(0.008)       | 0.064<br>(0.006)   | 0.05<br>(0.01)      | 0.047<br>(0.01)  |
| Bx3                                                            | 0.65<br>(0.02)        | 0.90<br>(0.09)     | 0.73<br>(0.16)      | 0.93<br>(0.12)   | Bx3                                                             | 0.04<br>(0.008)       | 0.074<br>(0.007)   | 0.05<br>(0.01)      | 0.082<br>(0.01)  |
| <b>Muscle Total DAG levels<br/>(ug/mg muscle)</b>              |                       |                    |                     |                  | <b>Muscle Saturated DAG levels<br/>(ug/mg muscle)</b>           |                       |                    |                     |                  |
|                                                                | Sedentary<br>glycerol | Sedentary<br>Lipid | Trained<br>glycerol | Trained<br>Lipid |                                                                 | Sedentary<br>glycerol | Sedentary<br>Lipid | Trained<br>glycerol | Trained<br>Lipid |
| Bx1                                                            | 0.16<br>(0.05)        | 0.27<br>(0.05)     | 0.12<br>(0.05)      | 0.16<br>(0.04)   | Bx1                                                             | 0.11<br>(0.03)        | 0.16<br>(0.03)     | 0.08<br>(0.03)      | 0.11<br>(0.02)   |
| Bx2                                                            | 0.17<br>(0.04)        | 0.23<br>(0.05)     | 0.12<br>(0.05)      | 0.19<br>(0.04)   | Bx2                                                             | 0.12<br>(0.03)        | 0.13<br>(0.03)     | 0.08<br>(0.03)      | 0.12<br>(0.02)   |
| Bx3                                                            | 0.13<br>(0.04)        | 0.4<br>(0.05)      | 0.15<br>(0.04)      | 0.22<br>(0.04)   | Bx3                                                             | 0.1<br>(0.02)         | 0.19<br>(0.03)     | 0.1<br>(0.02)       | 0.14<br>(0.02)   |

| <b>Muscle Oleic Levels in DAG (ug/mg muscle)</b>                   |                    |                  |                   |                   |                                                               |                    |                  |                   |                   |
|--------------------------------------------------------------------|--------------------|------------------|-------------------|-------------------|---------------------------------------------------------------|--------------------|------------------|-------------------|-------------------|
|                                                                    | Sedentary glycerol | Sedentary Lipid  | Trained glycerol  | Trained Lipid     |                                                               |                    |                  |                   |                   |
| Bx1                                                                | 0.019<br>(0.003)   | 0.040<br>(0.01)  | 0.015<br>(0.003)  | 0.024<br>(0.005)  |                                                               |                    |                  |                   |                   |
| Bx2                                                                | 0.020<br>(0.003)   | 0.032<br>(0.01)  | 0.015<br>(0.003)  | 0.025<br>(0.005)  |                                                               |                    |                  |                   |                   |
| Bx3                                                                | 0.013<br>(0.003)   | 0.060<br>(0.01)  | 0.020<br>(0.003)  | 0.030<br>(0.005)  |                                                               |                    |                  |                   |                   |
| <b>Muscle Linoleic (18:2) Levels in DAG (ug/mg muscle)</b>         |                    |                  |                   |                   | <b>Muscle Linolenic (18:3) Levels in DAG (ug/mg muscle)</b>   |                    |                  |                   |                   |
|                                                                    | Sedentary glycerol | Sedentary Lipid  | Trained glycerol  | Trained Lipid     |                                                               | Sedentary glycerol | Sedentary Lipid  | Trained glycerol  | Trained Lipid     |
| Bx1                                                                | 0.016<br>(0.01)    | 0.043<br>(0.01)  | 0.014<br>(0.01)   | 0.017<br>(0.01)   | Bx1                                                           | 0.001<br>(0.002)   | 0.004<br>(0.002) | 0.001<br>(0.002)  | 0.002<br>(0.002)  |
| Bx2                                                                | 0.017<br>(0.01)    | 0.041<br>(0.01)  | 0.014<br>(0.01)   | 0.027<br>(0.01)   | Bx2                                                           | 0.001<br>(0.002)   | 0.005<br>(0.002) | 0.001<br>(0.002)  | 0.003<br>(0.002)  |
| Bx3                                                                | 0.01<br>(0.01)     | 0.11<br>(0.01)   | 0.02<br>(0.01)    | 0.037<br>(0.01)   | Bx3                                                           | 0.001<br>(0.002)   | 0.014<br>(0.002) | 0.001<br>(0.002)  | 0.004<br>(0.002)  |
| <b>Muscle Arachidonic Acid (20:4) Levels in DAG (ug/mg muscle)</b> |                    |                  |                   |                   | <b>Muscle elaidic acid (Trans 18:1) in DAG (ug/mg muscle)</b> |                    |                  |                   |                   |
|                                                                    | Sedentary glycerol | Sedentary Lipid  | Trained glycerol  | Trained Lipid     |                                                               | Sedentary glycerol | Sedentary Lipid  | Trained glycerol  | Trained Lipid     |
| Bx1                                                                | 0.003<br>(0.0004)  | 0.006<br>(0.002) | 0.003<br>(0.0005) | 0.003<br>(0.0004) | Bx1                                                           | 0.004<br>(0.001)   | 0.002<br>(0.001) | 0.002<br>(0.0002) | 0.002<br>(0.0004) |
| Bx2                                                                | 0.003<br>(0.0004)  | 0.005<br>(0.002) | 0.003<br>(0.0005) | 0.003<br>(0.0004) | Bx2                                                           | 0.003<br>(0.001)   | 0.002<br>(0.001) | 0.002<br>(0.0002) | 0.001<br>(0.0004) |
| Bx3                                                                | 0.003<br>(0.0004)  | 0.007<br>(0.002) | 0.003<br>(0.0004) | 0.004<br>(0.0004) | Bx3                                                           | 0.004<br>(0.001)   | 0.001<br>(0.001) | 0.002<br>(0.0002) | 0.002<br>(0.0004) |

| <b>Muscle Total Ceramide levels<br/>(ng/mg tissue)</b>       |                       |                    |                     |                   | <b>Muscle Saturated Ceramide levels<br/>(ng/mg tissue)</b> |                       |                    |                     |                  |
|--------------------------------------------------------------|-----------------------|--------------------|---------------------|-------------------|------------------------------------------------------------|-----------------------|--------------------|---------------------|------------------|
|                                                              | Sedentary<br>glycerol | Sedentary<br>Lipid | Trained<br>glycerol | Trained<br>Lipid  |                                                            | Sedentary<br>glycerol | Sedentary<br>Lipid | Trained<br>glycerol | Trained<br>Lipid |
| Bx1                                                          | 29.6<br>(5.2)         | 31.8<br>(5.9)      | 43.4<br>(5.4)       | 41.5<br>(5.0)     | Bx1                                                        | 27.1<br>(4.8)         | 28.9<br>(2.4)      | 39.5<br>(4.0)       | 37.5<br>(6.8)    |
| Bx2                                                          | 39.2<br>(5.2)         | 36.3<br>(5.9)      | 42.1<br>(5.2)       | 44.3<br>(5.0)     | Bx2                                                        | 35.4<br>(4.8)         | 33.4<br>(2.4)      | 38.2<br>(3.9)       | 40<br>(6.5)      |
| Bx3                                                          | 32.3<br>(5.2)         | 37.3<br>(5.9)      | 36.9<br>(5.2)       | 39.3<br>(5.0)     | Bx3                                                        | 29.2<br>(4.8)         | 34.5<br>(2.4)      | 33.8<br>(3.9)       | 35.6<br>(6.8)    |
| <b>Muscle Palmitoyl-carnitine Levels<br/>(ug/mg tissue )</b> |                       |                    |                     |                   | <b>Muscle Oleoyl-carnitine Levels<br/>(ug/mg tissue )</b>  |                       |                    |                     |                  |
|                                                              | Sedentary<br>glycerol | Sedentary<br>Lipid | Trained<br>glycerol | Trained<br>Lipid  |                                                            | Sedentary<br>glycerol | Sedentary<br>Lipid | Trained<br>glycerol | Trained<br>Lipid |
| Bx1                                                          | 0.004<br>(0.0008)     | 0.005<br>(0.0009)  | 0.006<br>(0.0008)   | 0.006<br>(0.0007) | Bx1                                                        | 0.01<br>(0.002)       | 0.02<br>(0.002)    | 0.02<br>(0.002)     | 0.03<br>(0.004)  |
| Bx2                                                          | 0.004<br>(0.0007)     | 0.005<br>(0.0008)  | 0.006<br>(0.0007)   | 0.006<br>(0.0007) | Bx2                                                        | 0.01<br>(0.002)       | 0.02<br>(0.002)    | 0.02<br>(0.002)     | 0.03<br>(0.004)  |
| Bx3                                                          | 0.003<br>(0.0007)     | 0.004<br>(0.0008)  | 0.005<br>(0.0007)   | 0.006<br>(0.0007) | Bx3                                                        | 0.01<br>(0.002)       | 0.02<br>(0.002)    | 0.02<br>(0.002)     | 0.02<br>(0.004)  |
